# Supplementary material
Source: ML conference proceedings conference paper supplement (https://openreview.net/forum?id=x69O84Df2G)

Statistics for the base rewards  $\mathcal{R}_{\text{base}} - k = 3$

DBMR-BPI   RND   Disagreement   APT

$E[\text{med}_i X_{i,t}]$

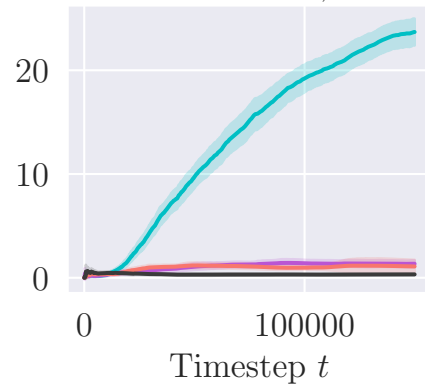

$E[\text{Avg}_i X_{i,t}]$

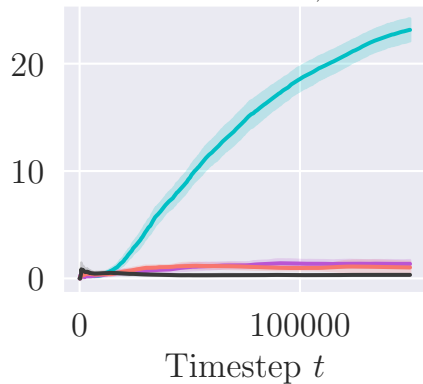

$E[\text{std}_i X_{i,t}]$

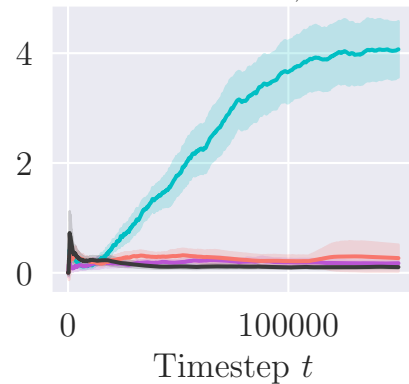

$E[\max_i X_{i,t}]$

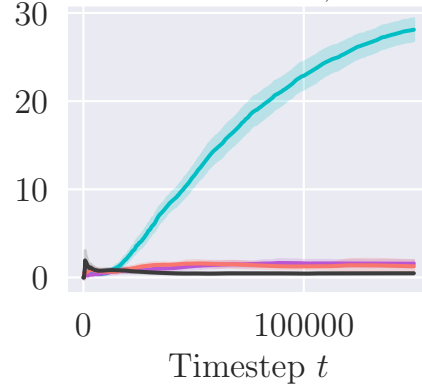

$E[\min_i X_{i,t}]$

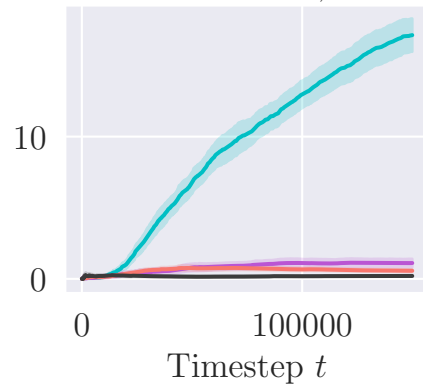

Supplement: supplementary_material [file attachment]
