# Supplementary material
Source: ML conference proceedings conference paper supplement (https://openreview.net/forum?id=x69O84Df2G)

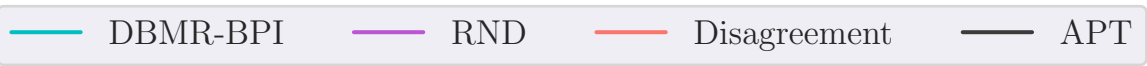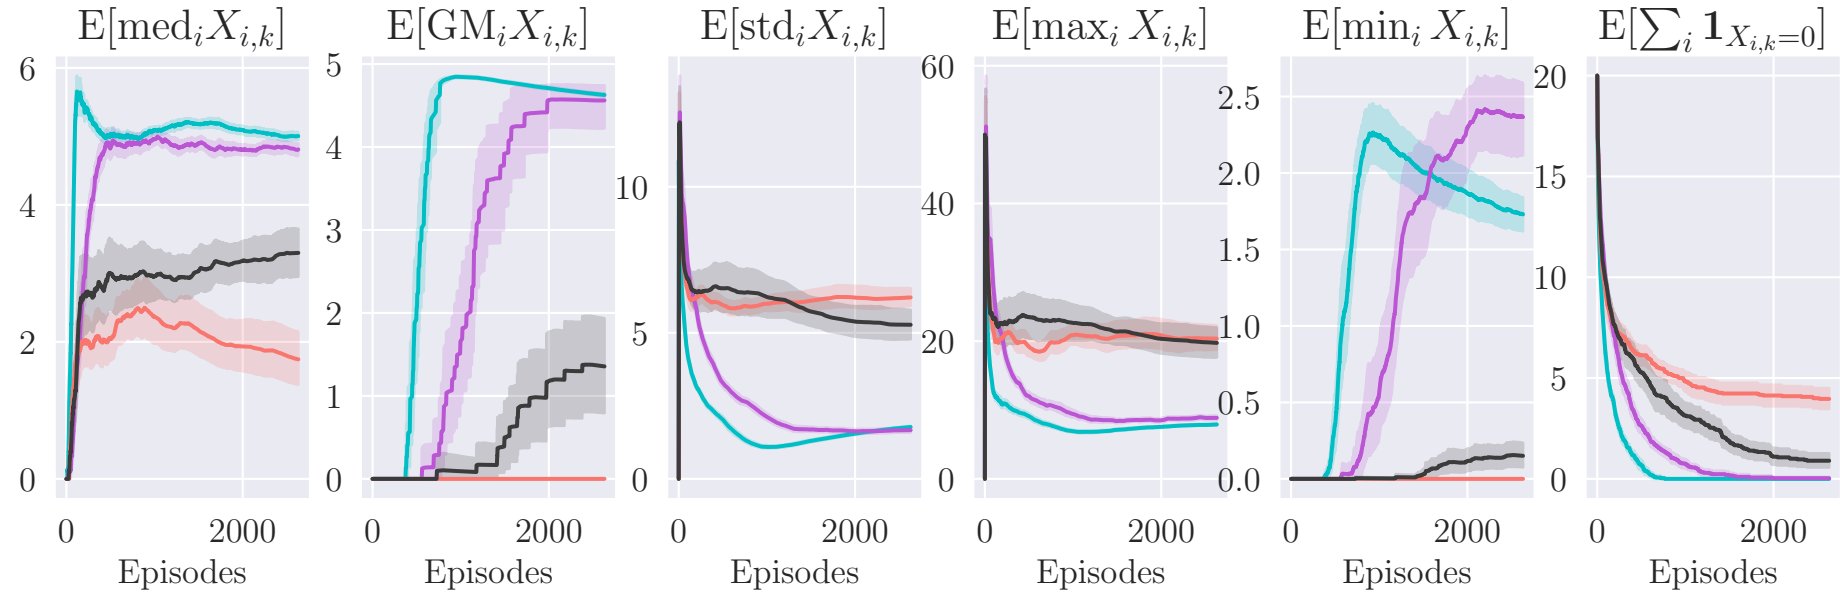

Supplement: supplementary_material [file attachment]

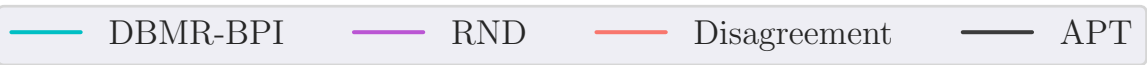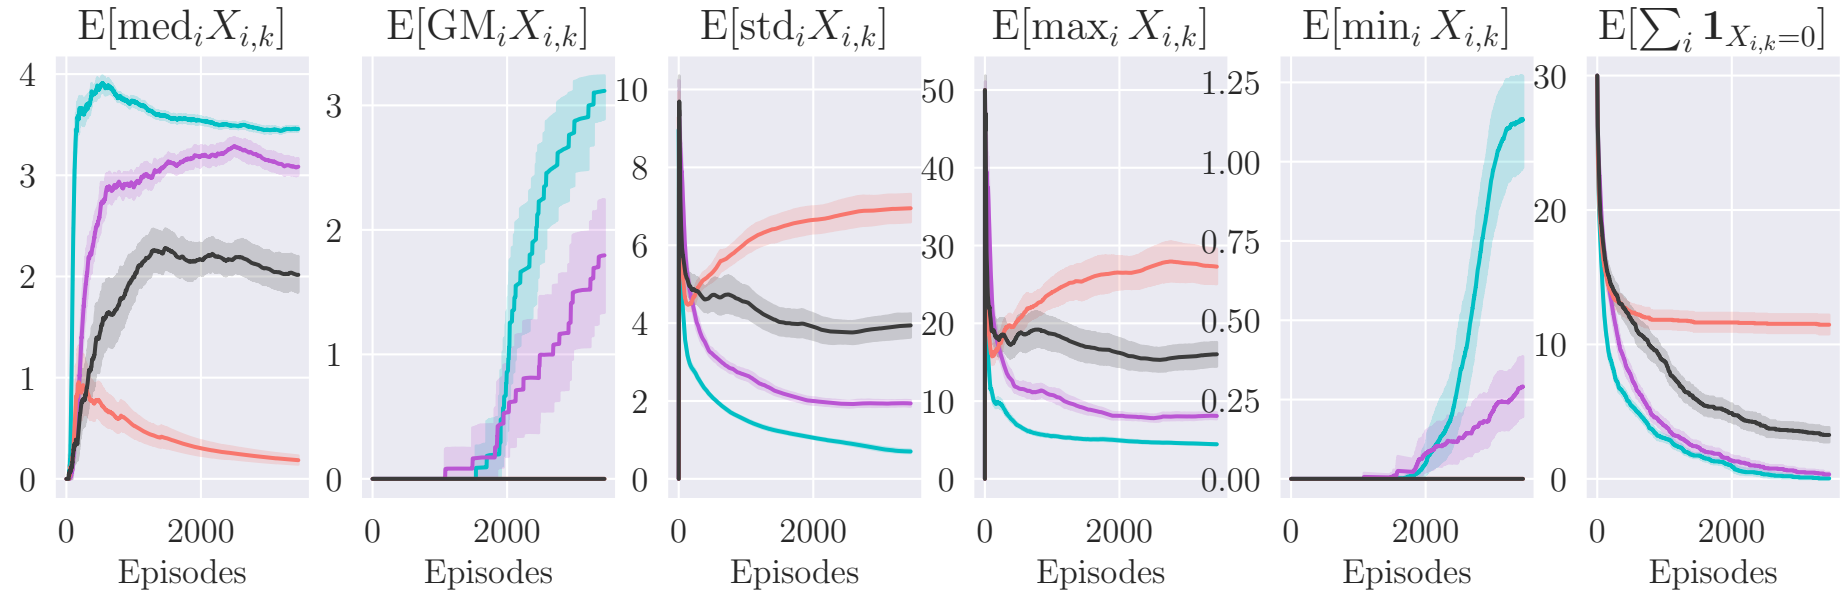

Supplement: supplementary_material [file attachment]

Value error over random rewards

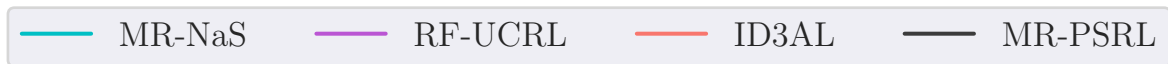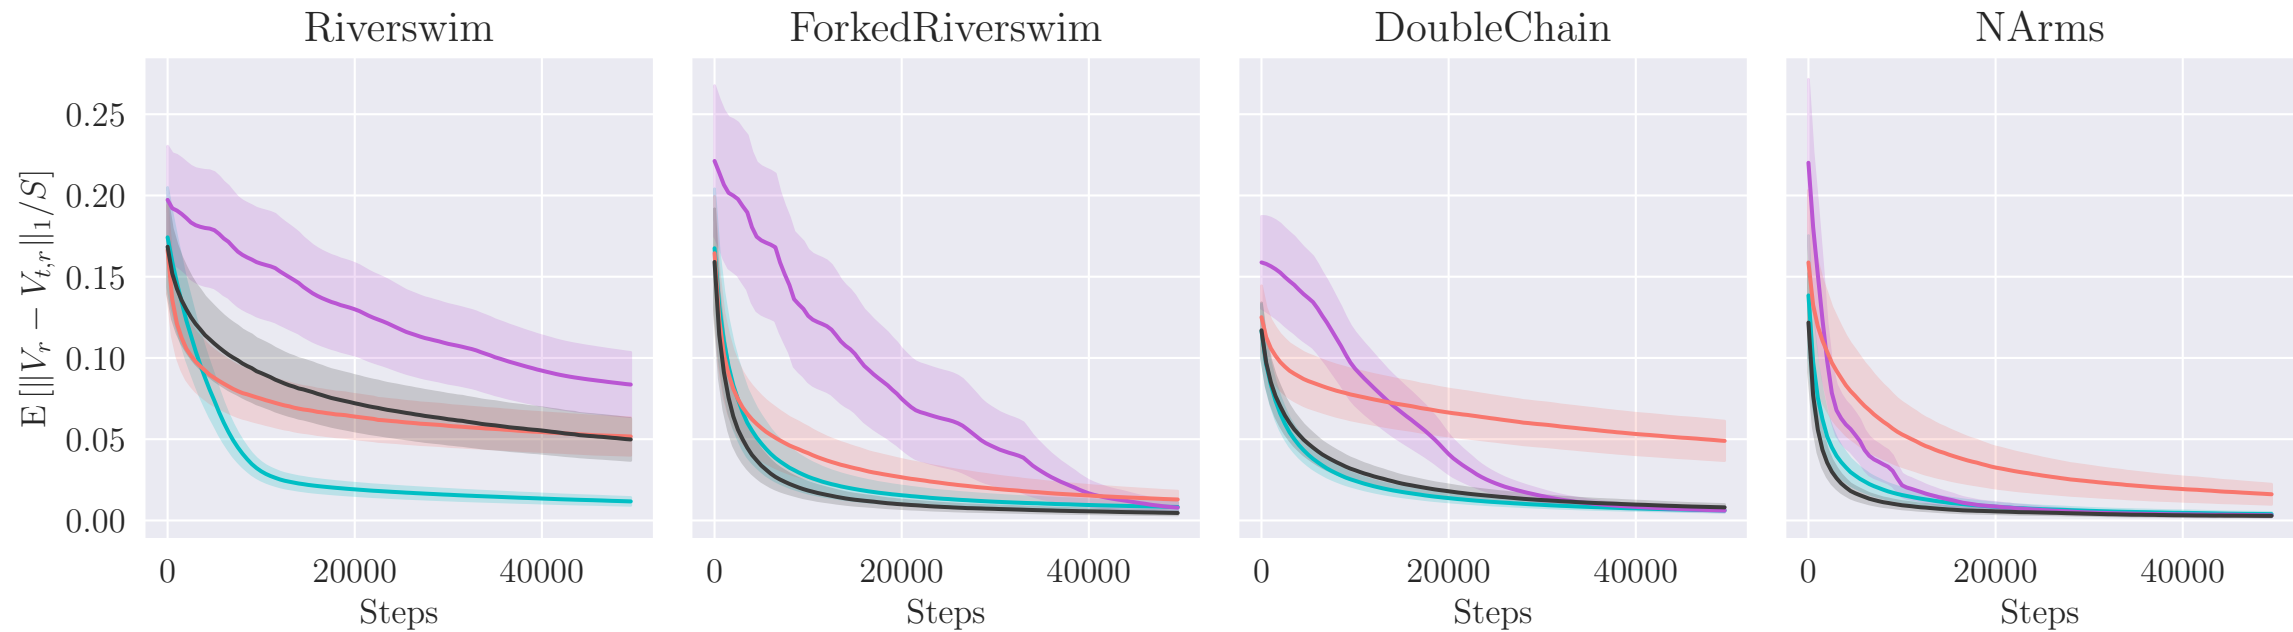

Supplement: supplementary_material [file attachment]

Value error over the canonical basis

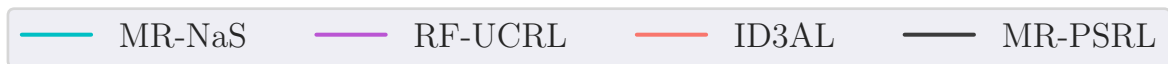

Riverswim

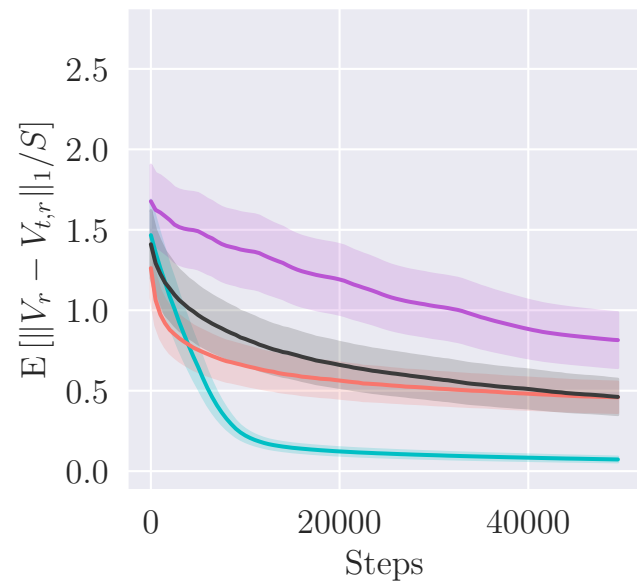

ForkedRiverswim

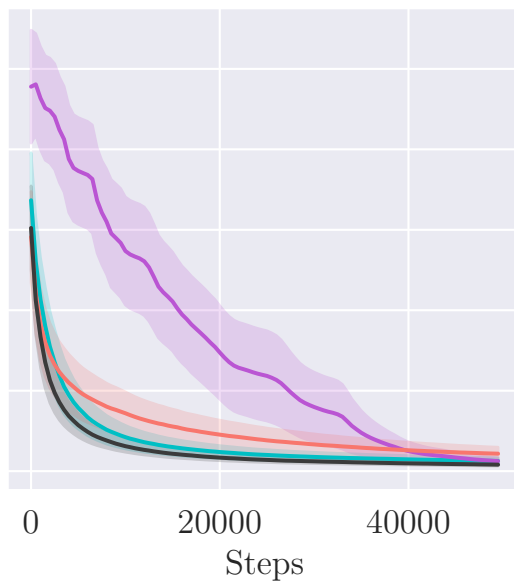

DoubleChain

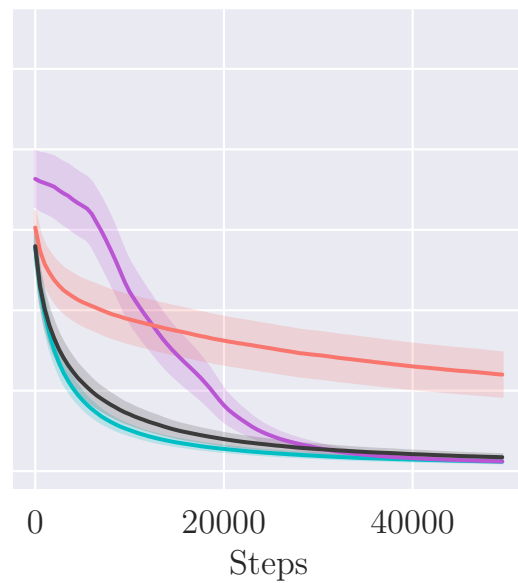

NArms

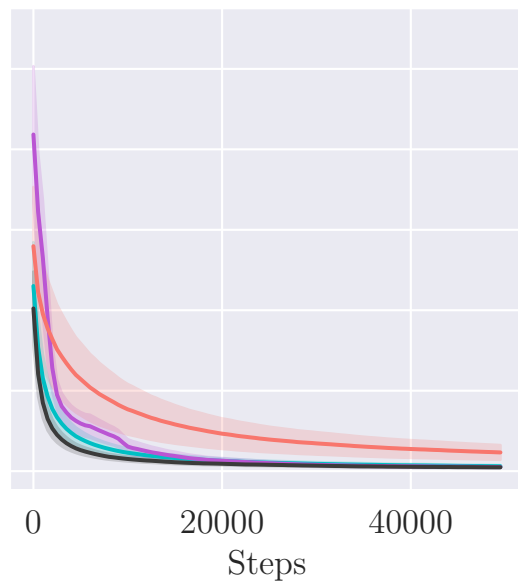

Supplement: supplementary_material [file attachment]

Estimation of  $\Delta_{t,r}$  for DBMR-BPI -  $k = 5$

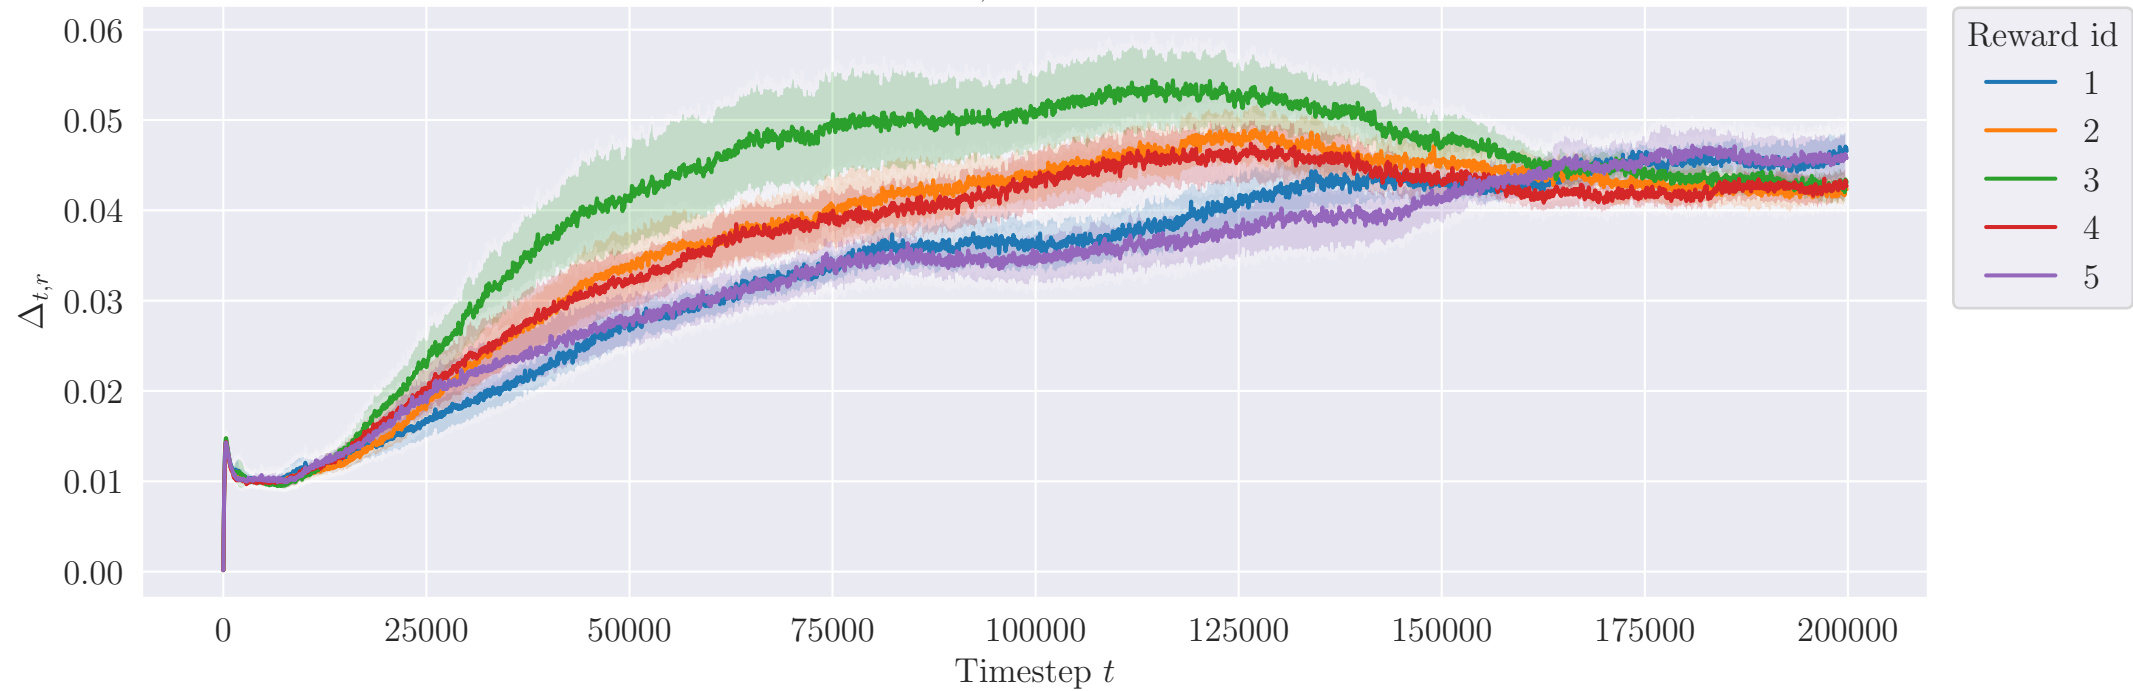

Supplement: supplementary_material [file attachment]

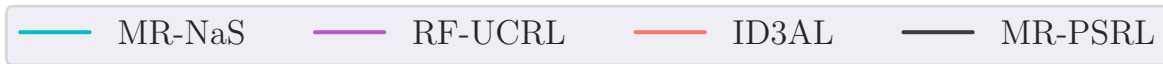

Riverswim

ForkedRiverswim

DoubleChain

NArms

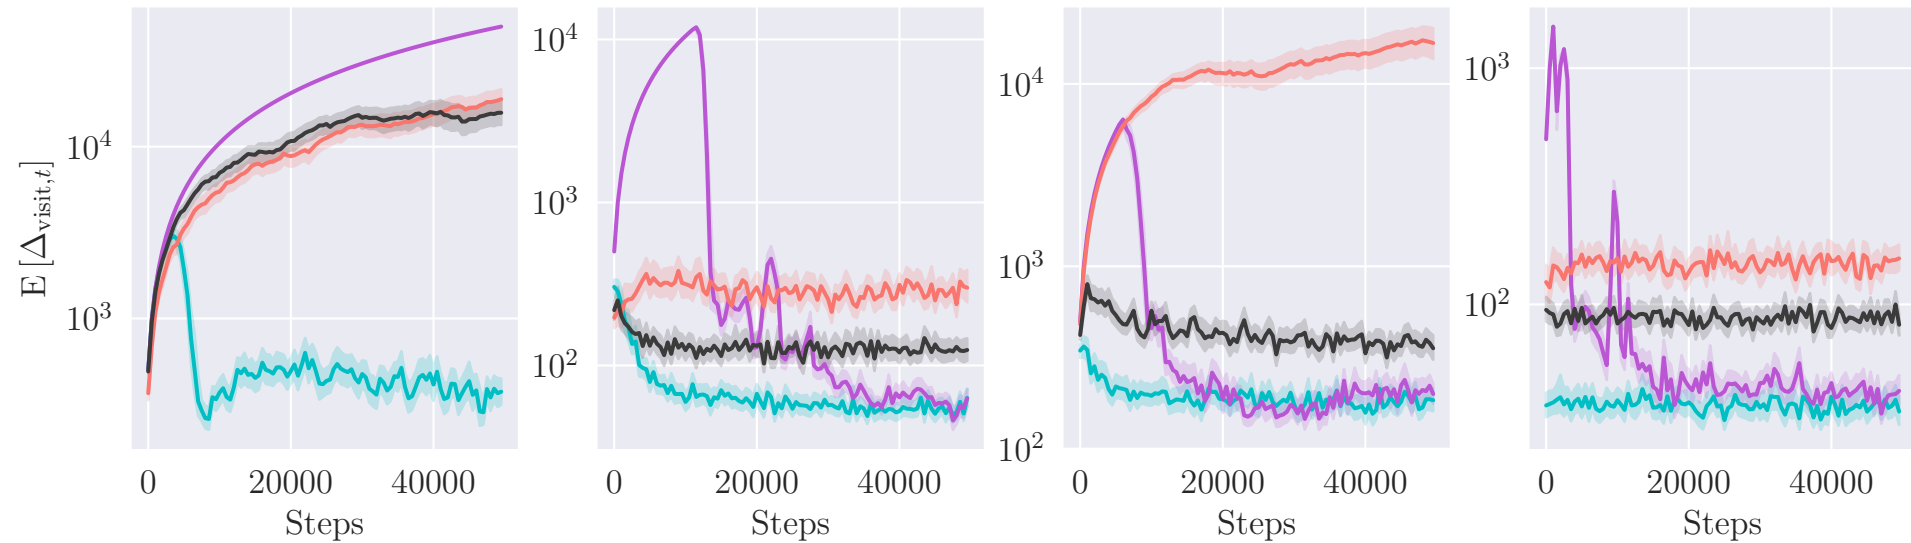

Supplement: supplementary_material [file attachment]

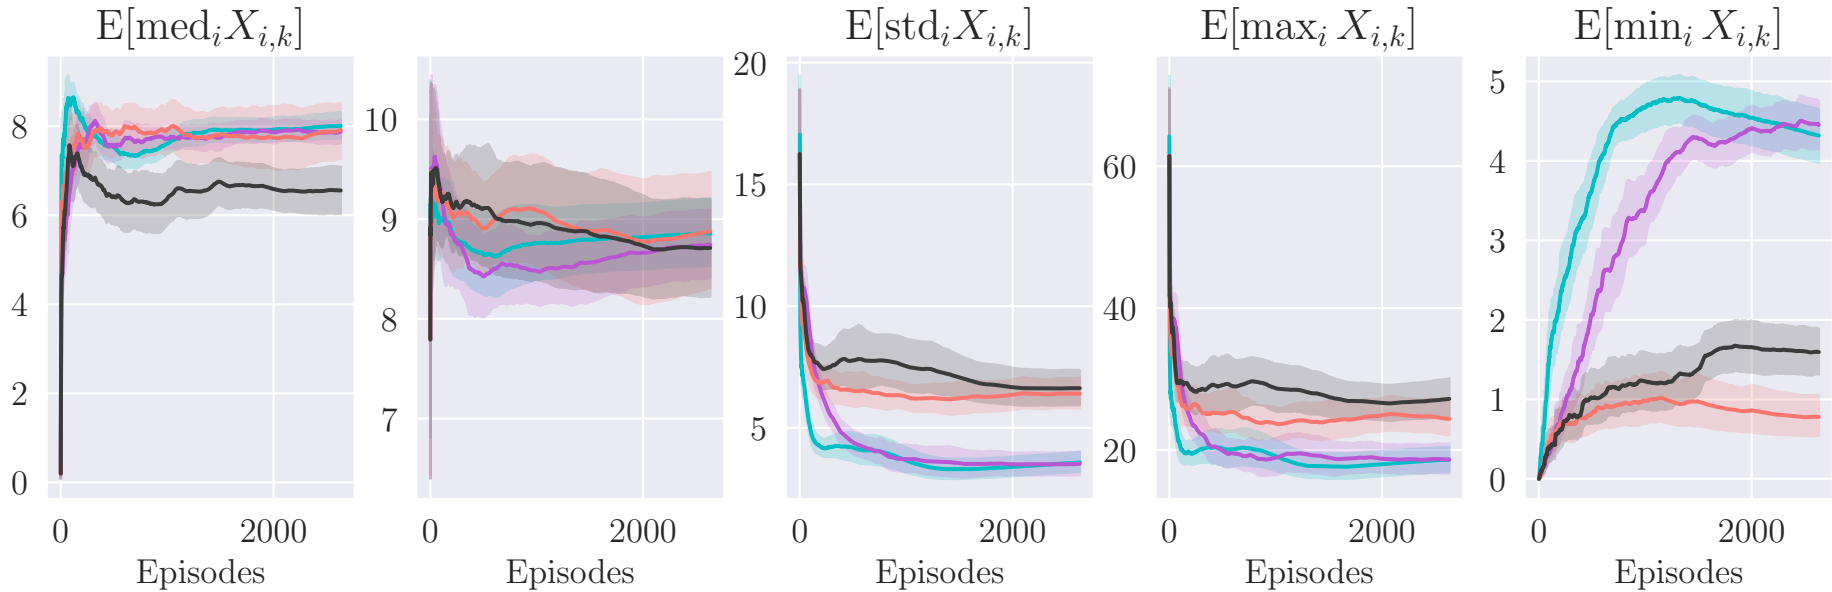

Supplement: supplementary_material [file attachment]

Number of rewards chosen by DBMR-BPI up to timestep  $T(N = 20)$

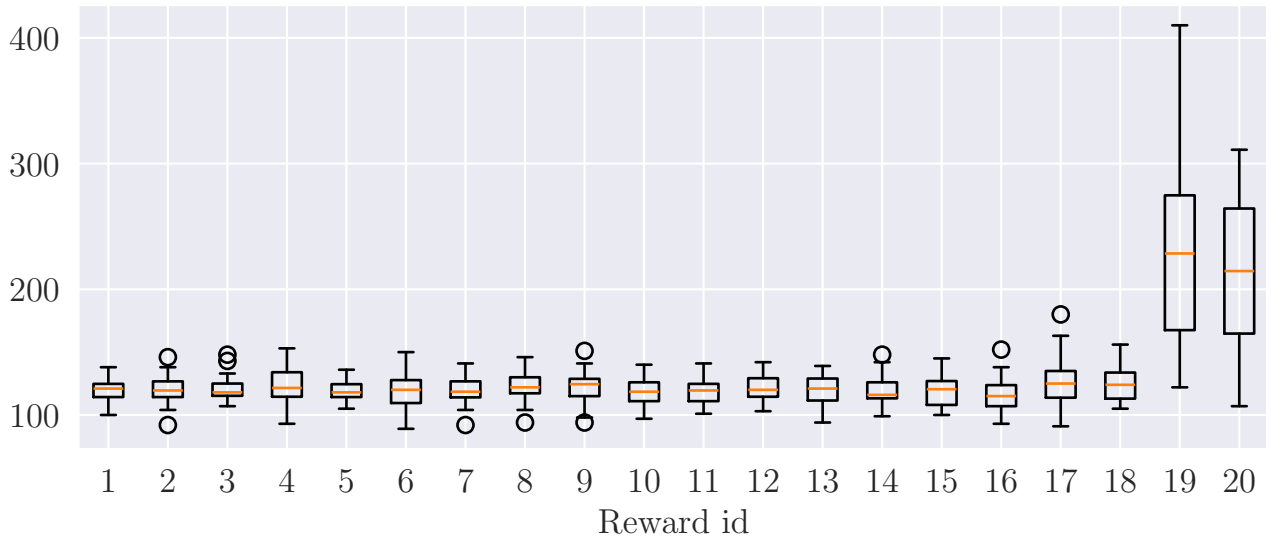

Supplement: supplementary_material [file attachment]

Number of rewards chosen by DBMR-BPI up to timestep  $T(k = 5)$

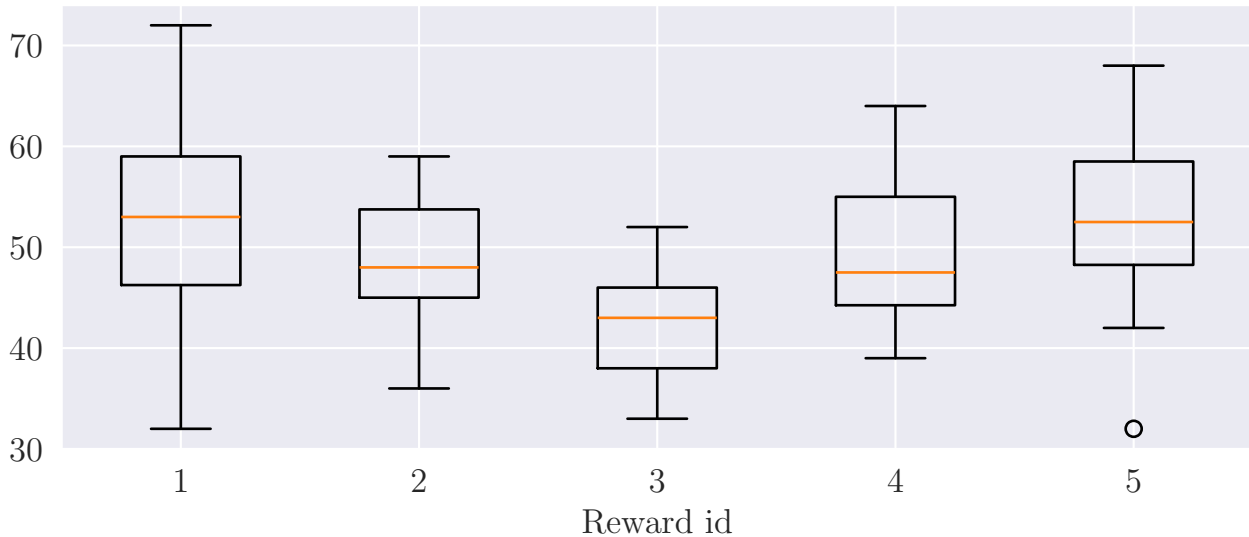

Supplement: supplementary_material [file attachment]

Number of rewards chosen by DBMR-BPI up to timestep  $T(N = 30)$

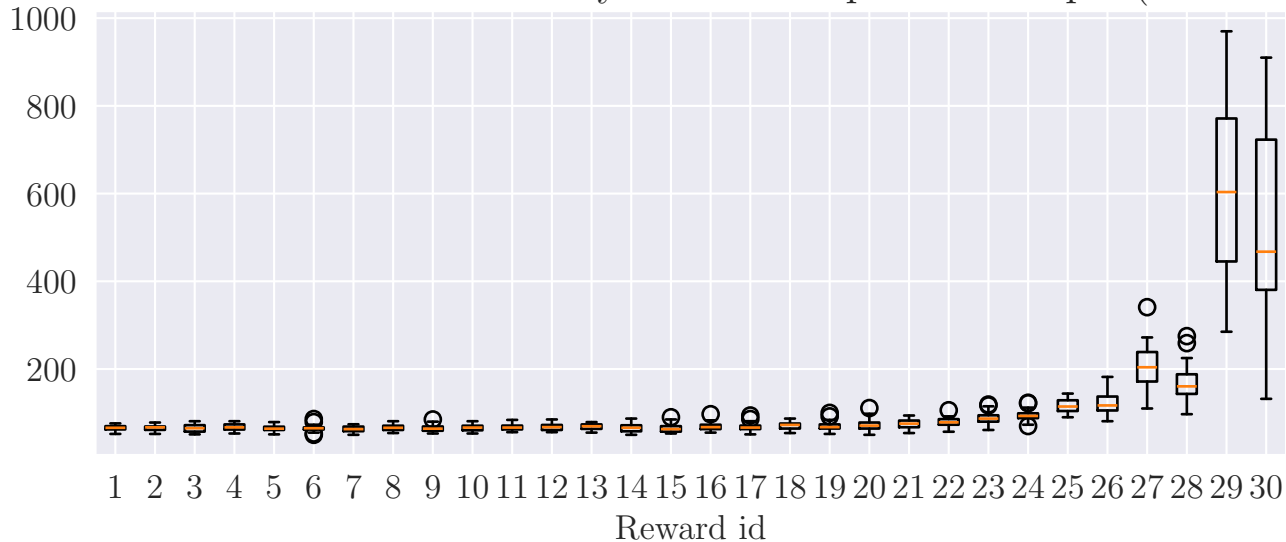

Supplement: supplementary_material [file attachment]

Estimation error over the canonical basis

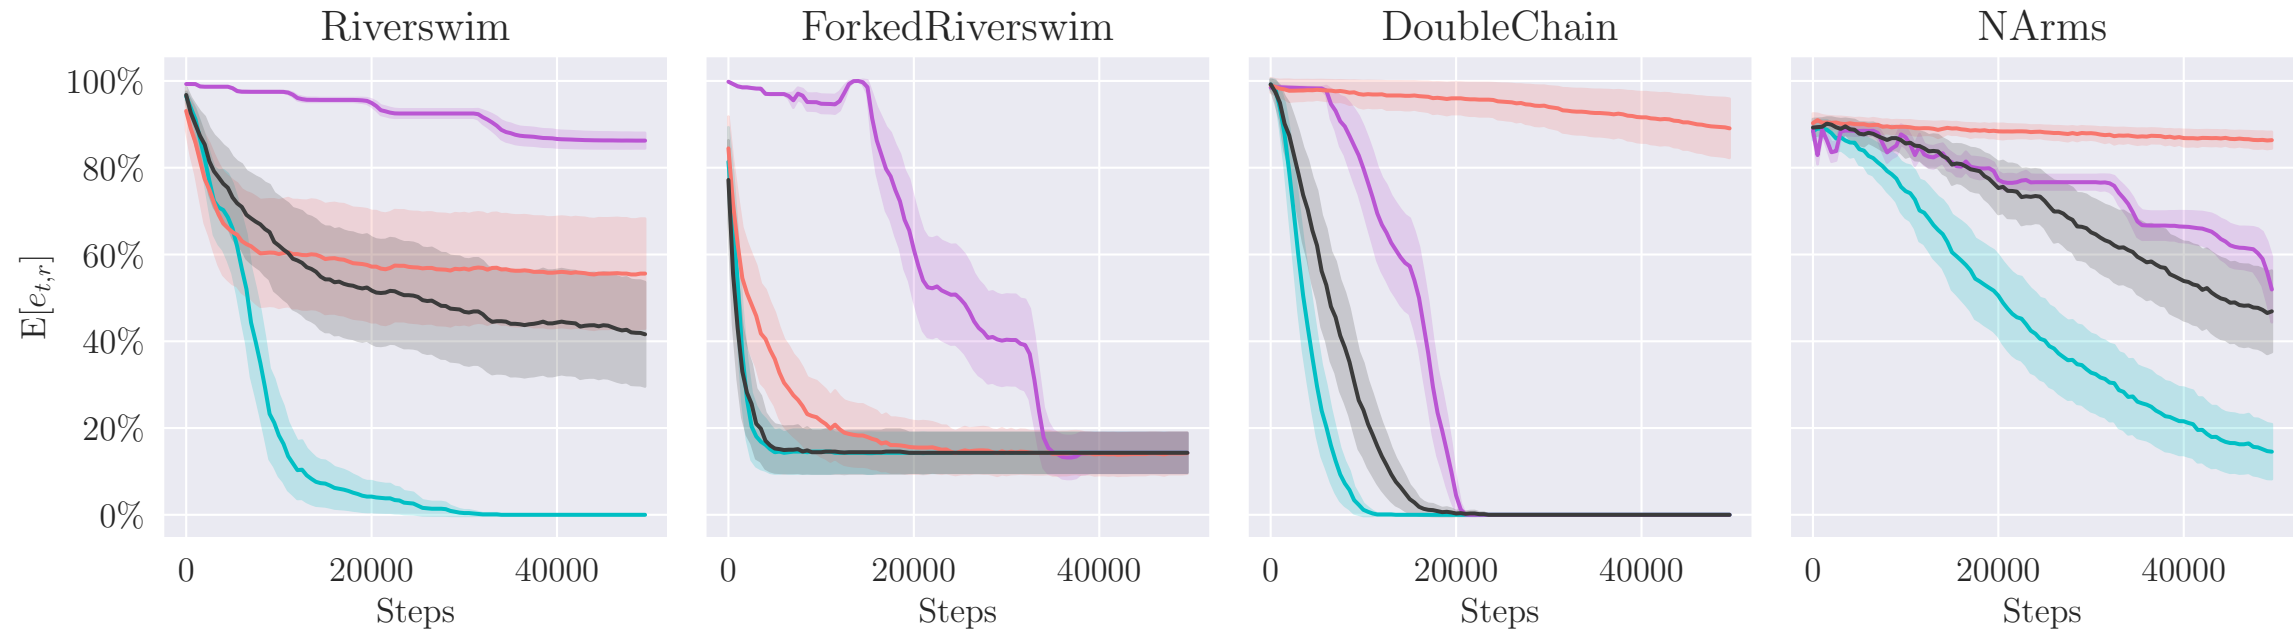

Supplement: supplementary_material [file attachment]

Estimation of  $\Delta_{t,r}$  for DBMR-BPI -  $k = 3$

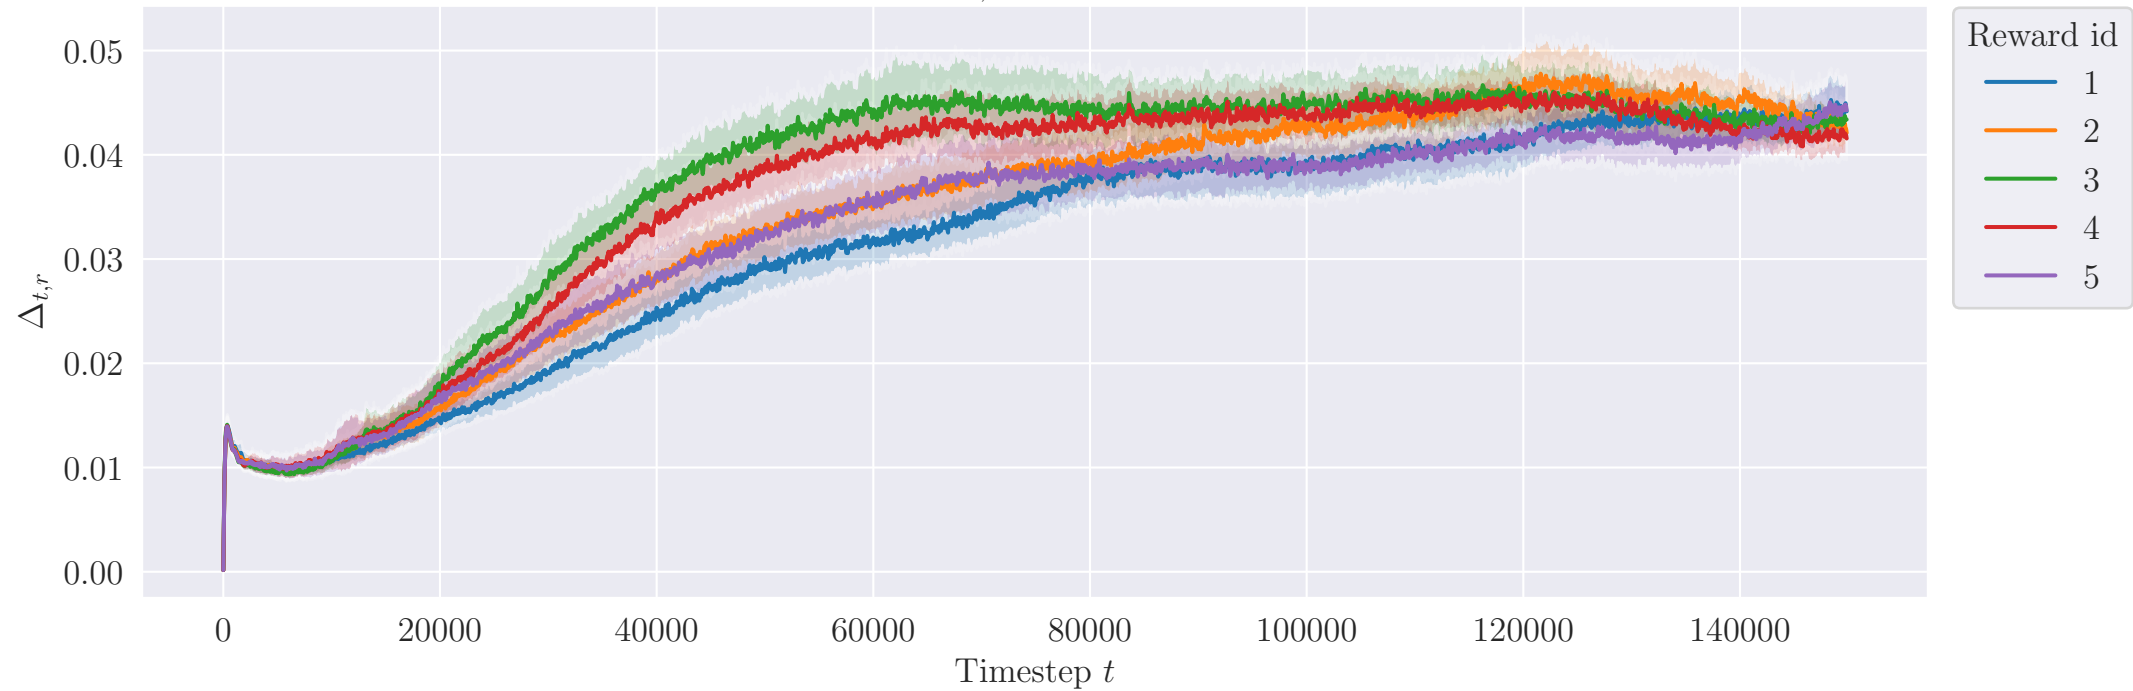

Supplement: supplementary_material [file attachment]

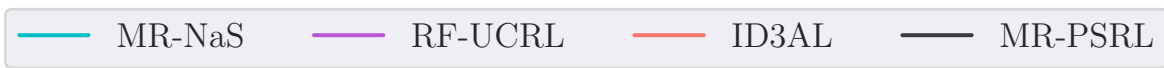

Riverswim

ForkedRiverswim

DoubleChain

NArms

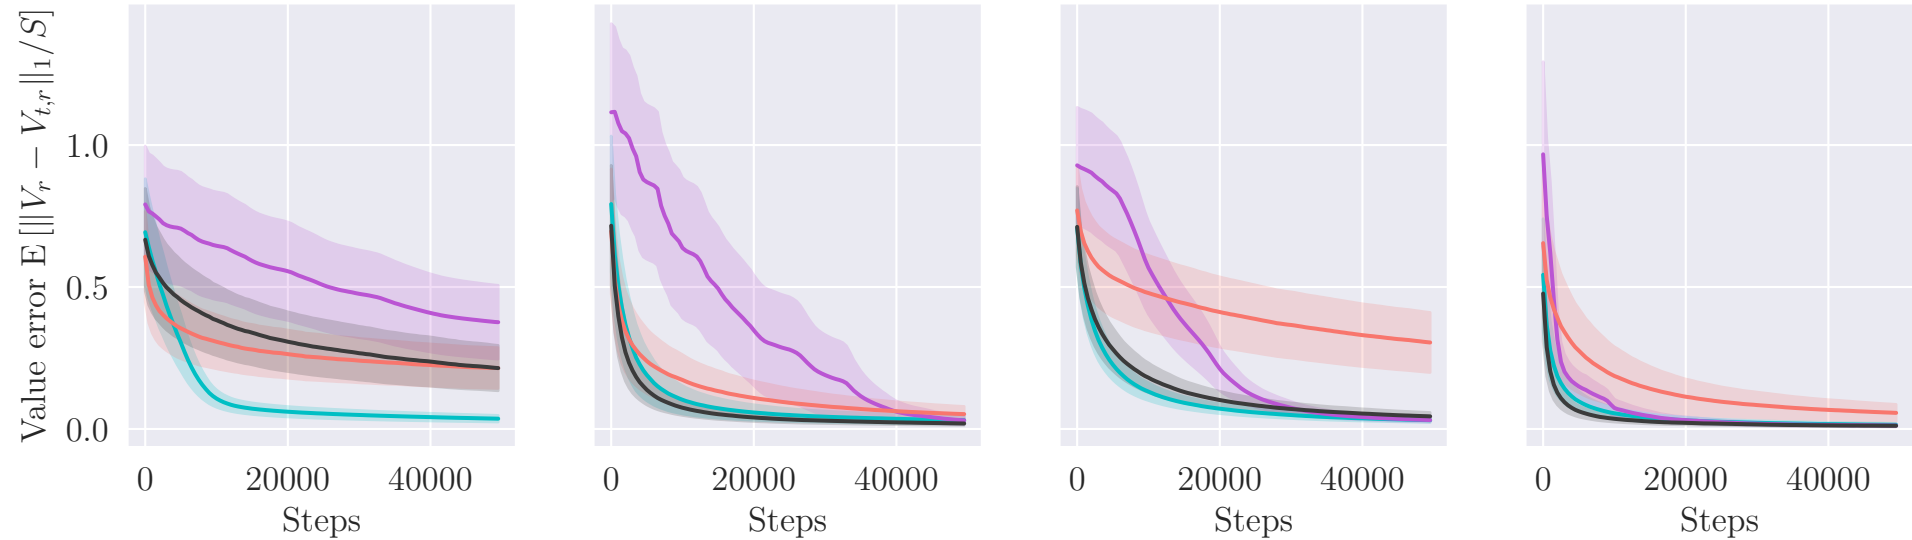

Supplement: supplementary_material [file attachment]

Estimation error over random rewards

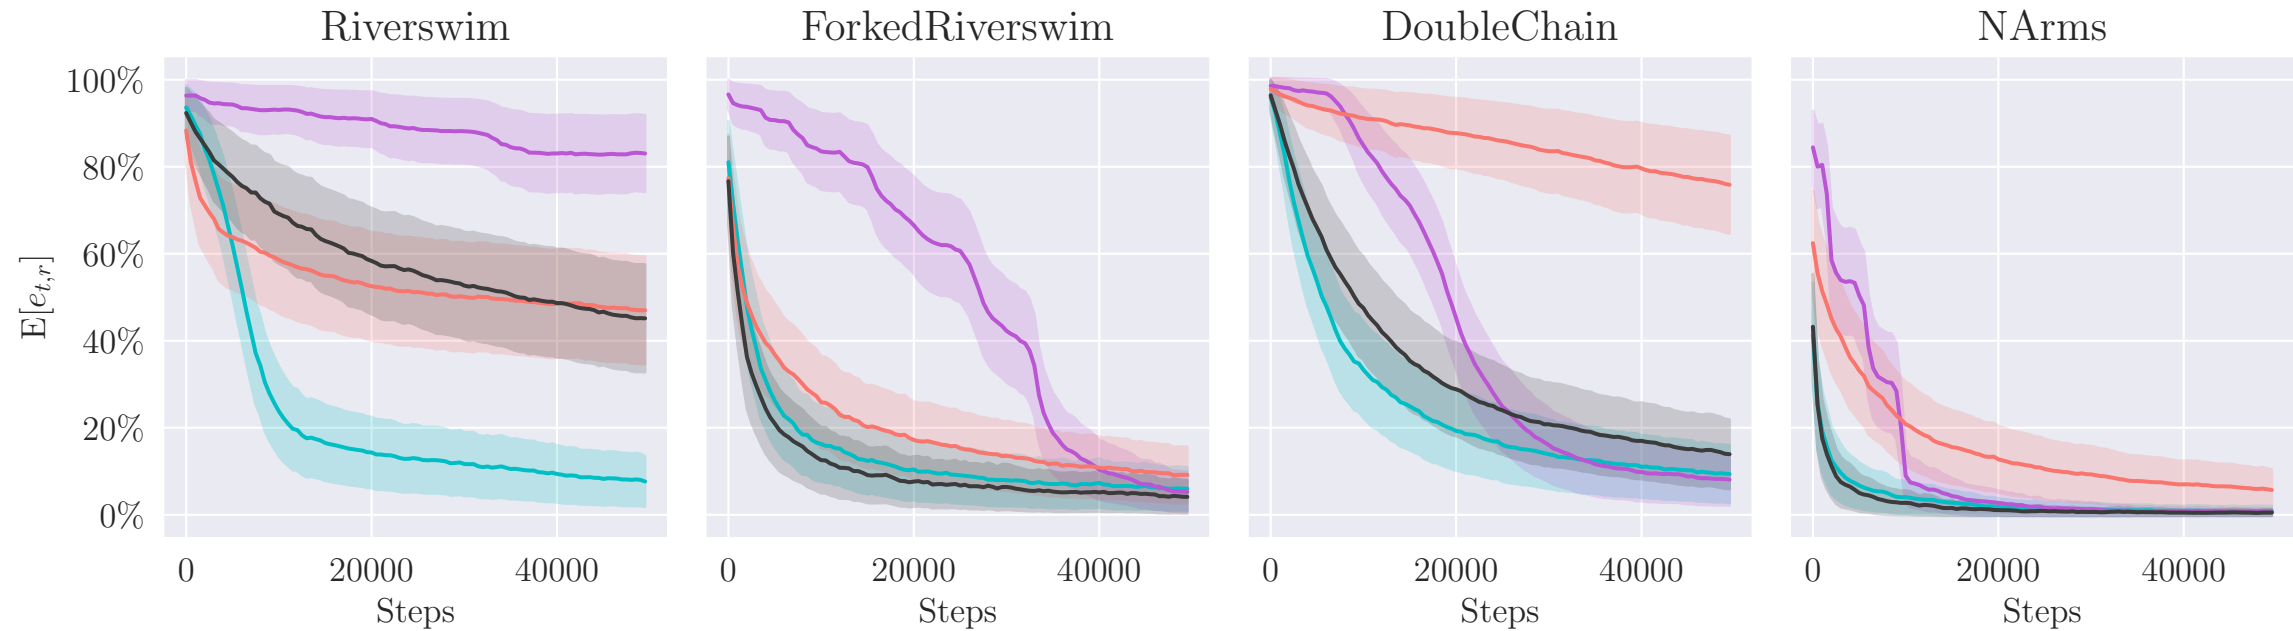

Supplement: supplementary_material [file attachment]

Number of rewards chosen by DBMR-BPI up to timestep  $T(k = 3)$

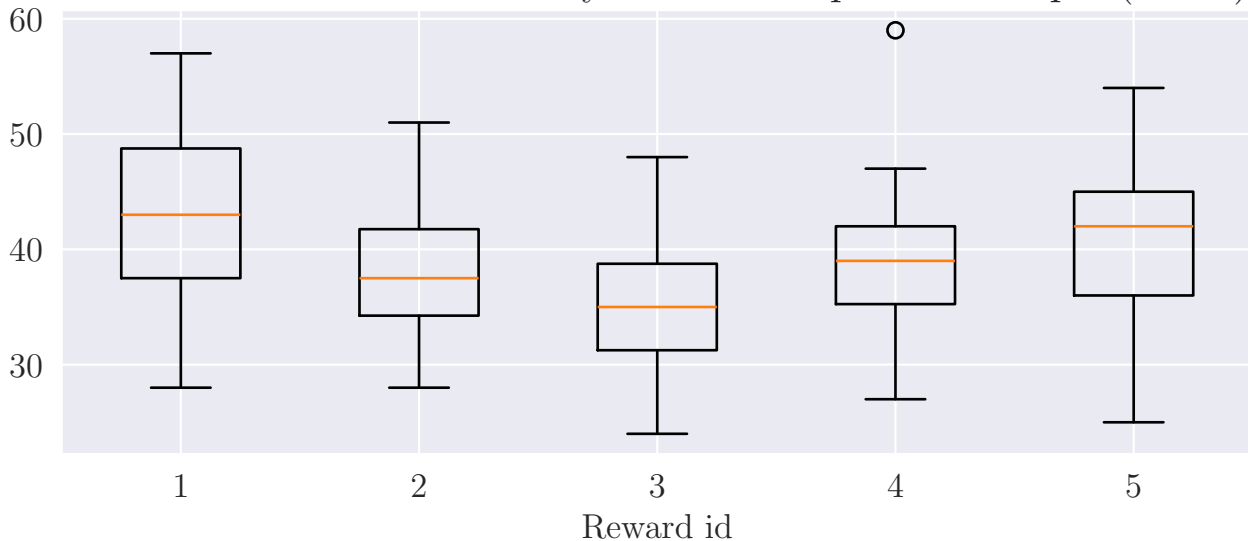

Supplement: supplementary_material [file attachment]

Estimation of  $\Delta_{t,r}$  for DBMR-BPI -  $N = 30$

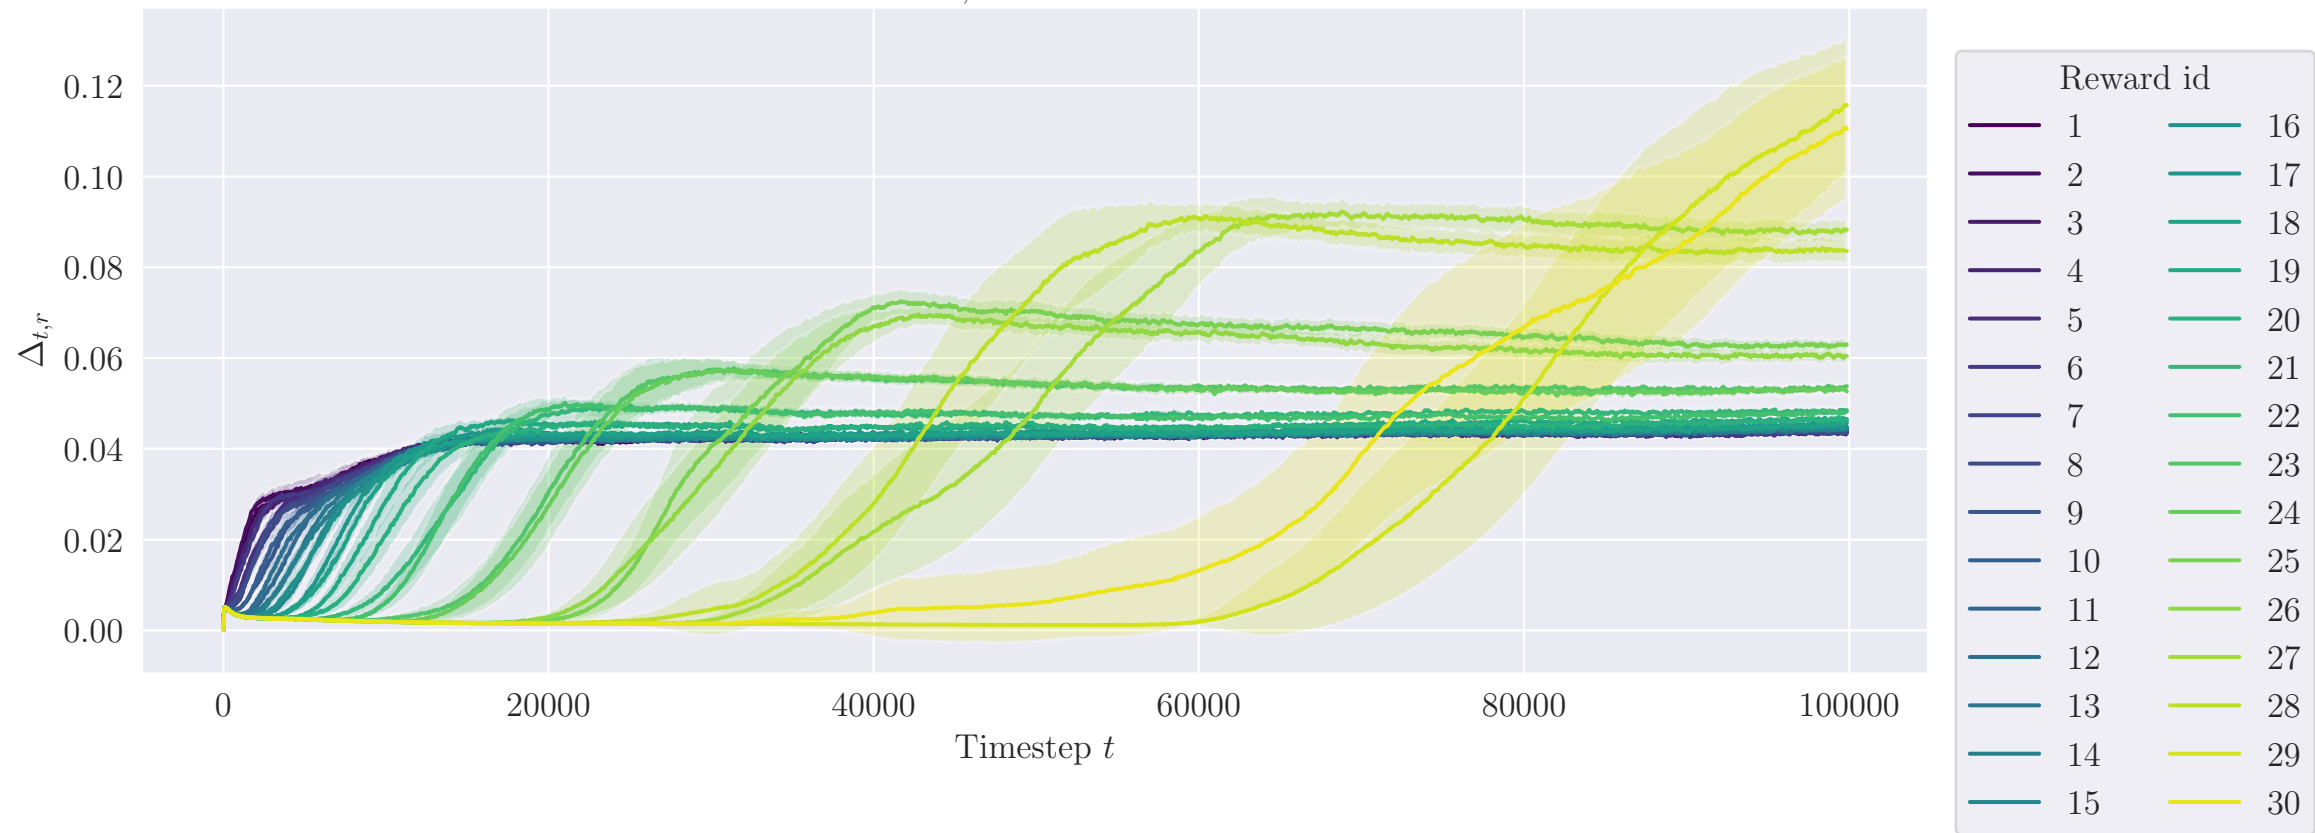

Supplement: supplementary_material [file attachment]



$E[\text{med}_i X_{i,k}]$

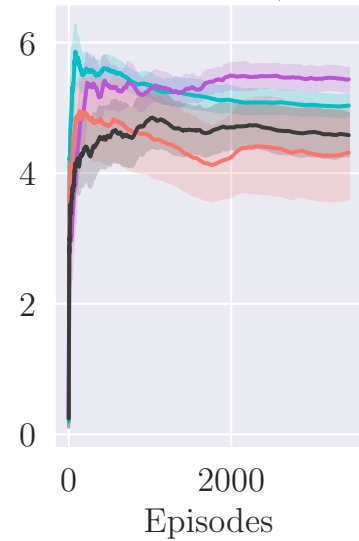

$E[\text{std}_i X_{i,k}]$

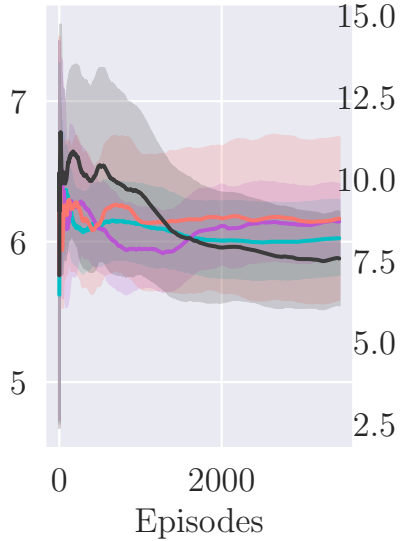

$E[\max_i X_{i,k}]$

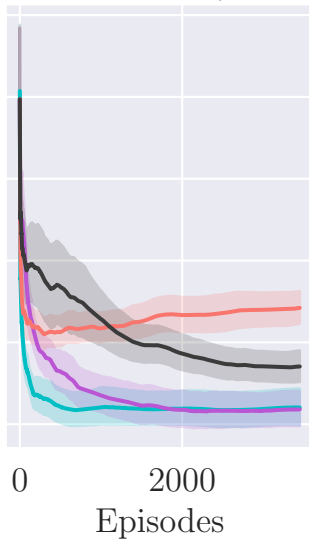

$E[\min_i X_{i,k}]$

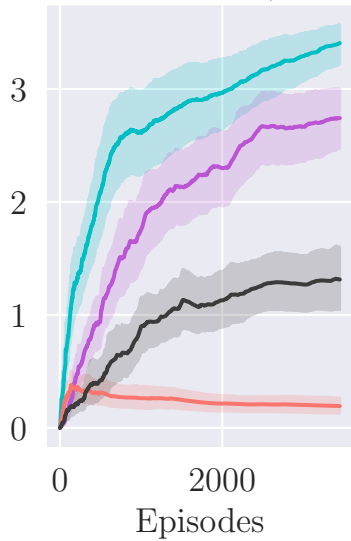

Supplement: supplementary_material [file attachment]

Estimation of  $\Delta_{t,r}$  for DBMR-BPI -  $N = 20$

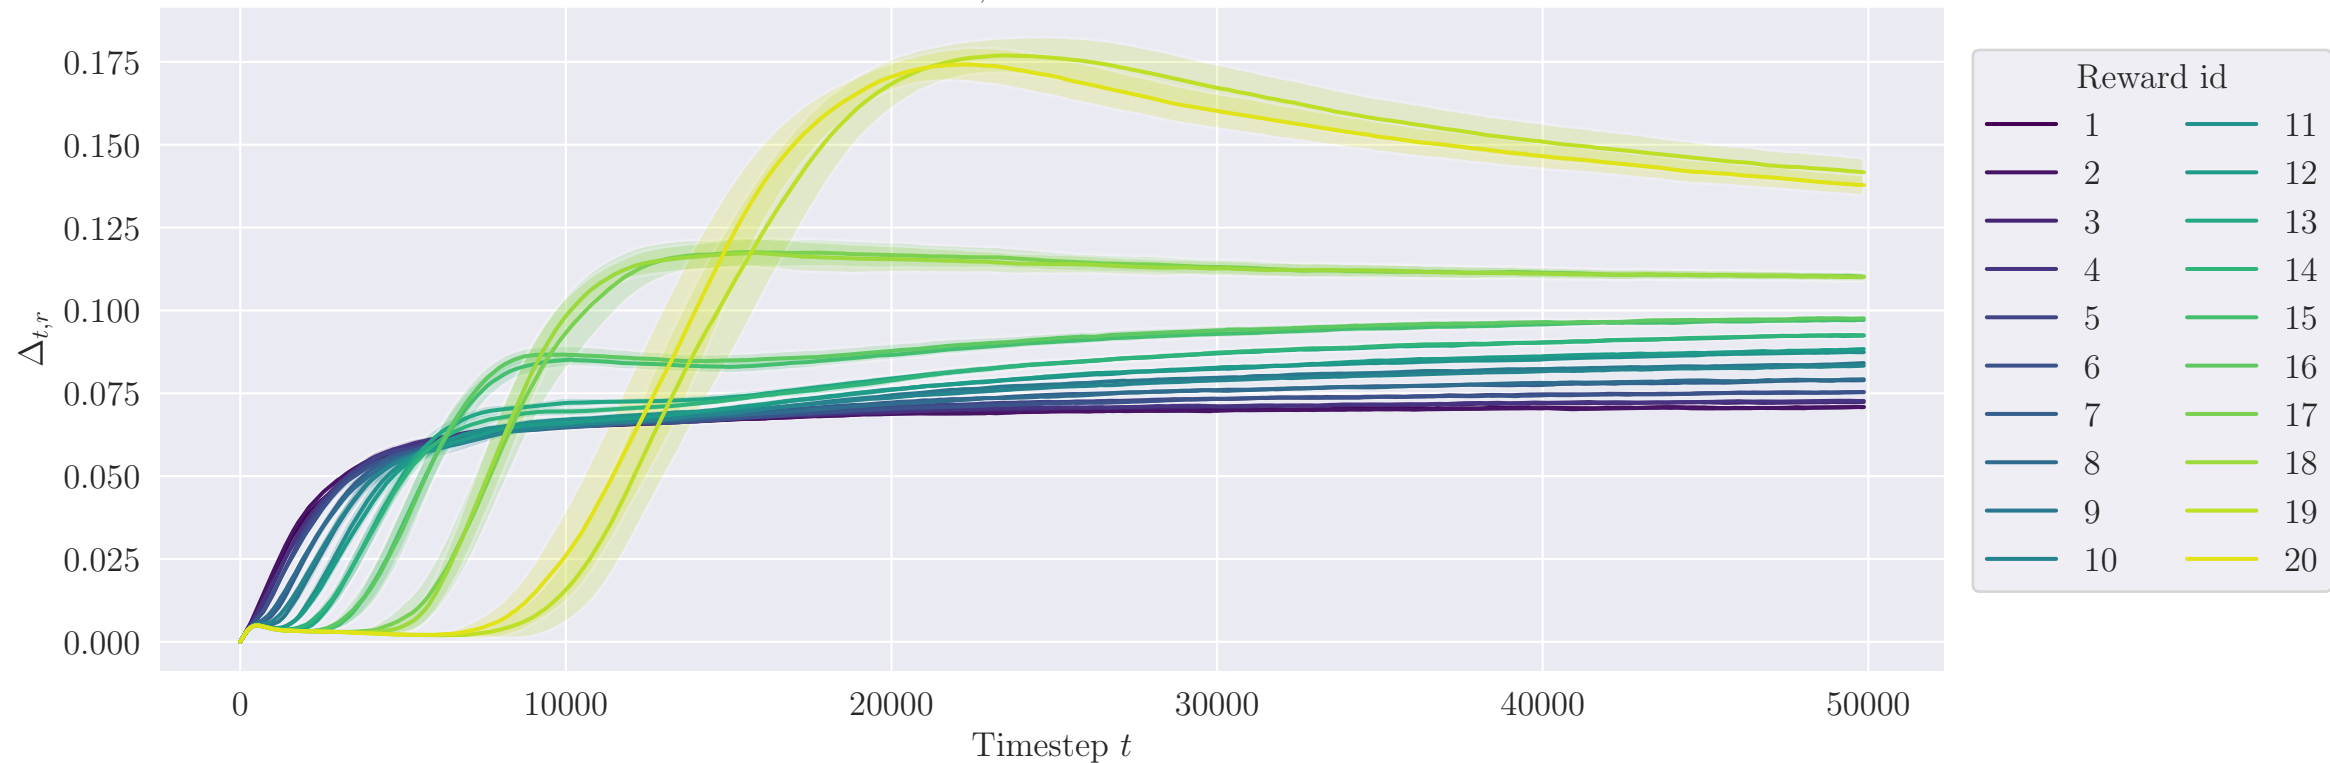

Supplement: supplementary_material [file attachment]

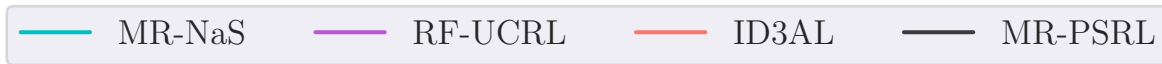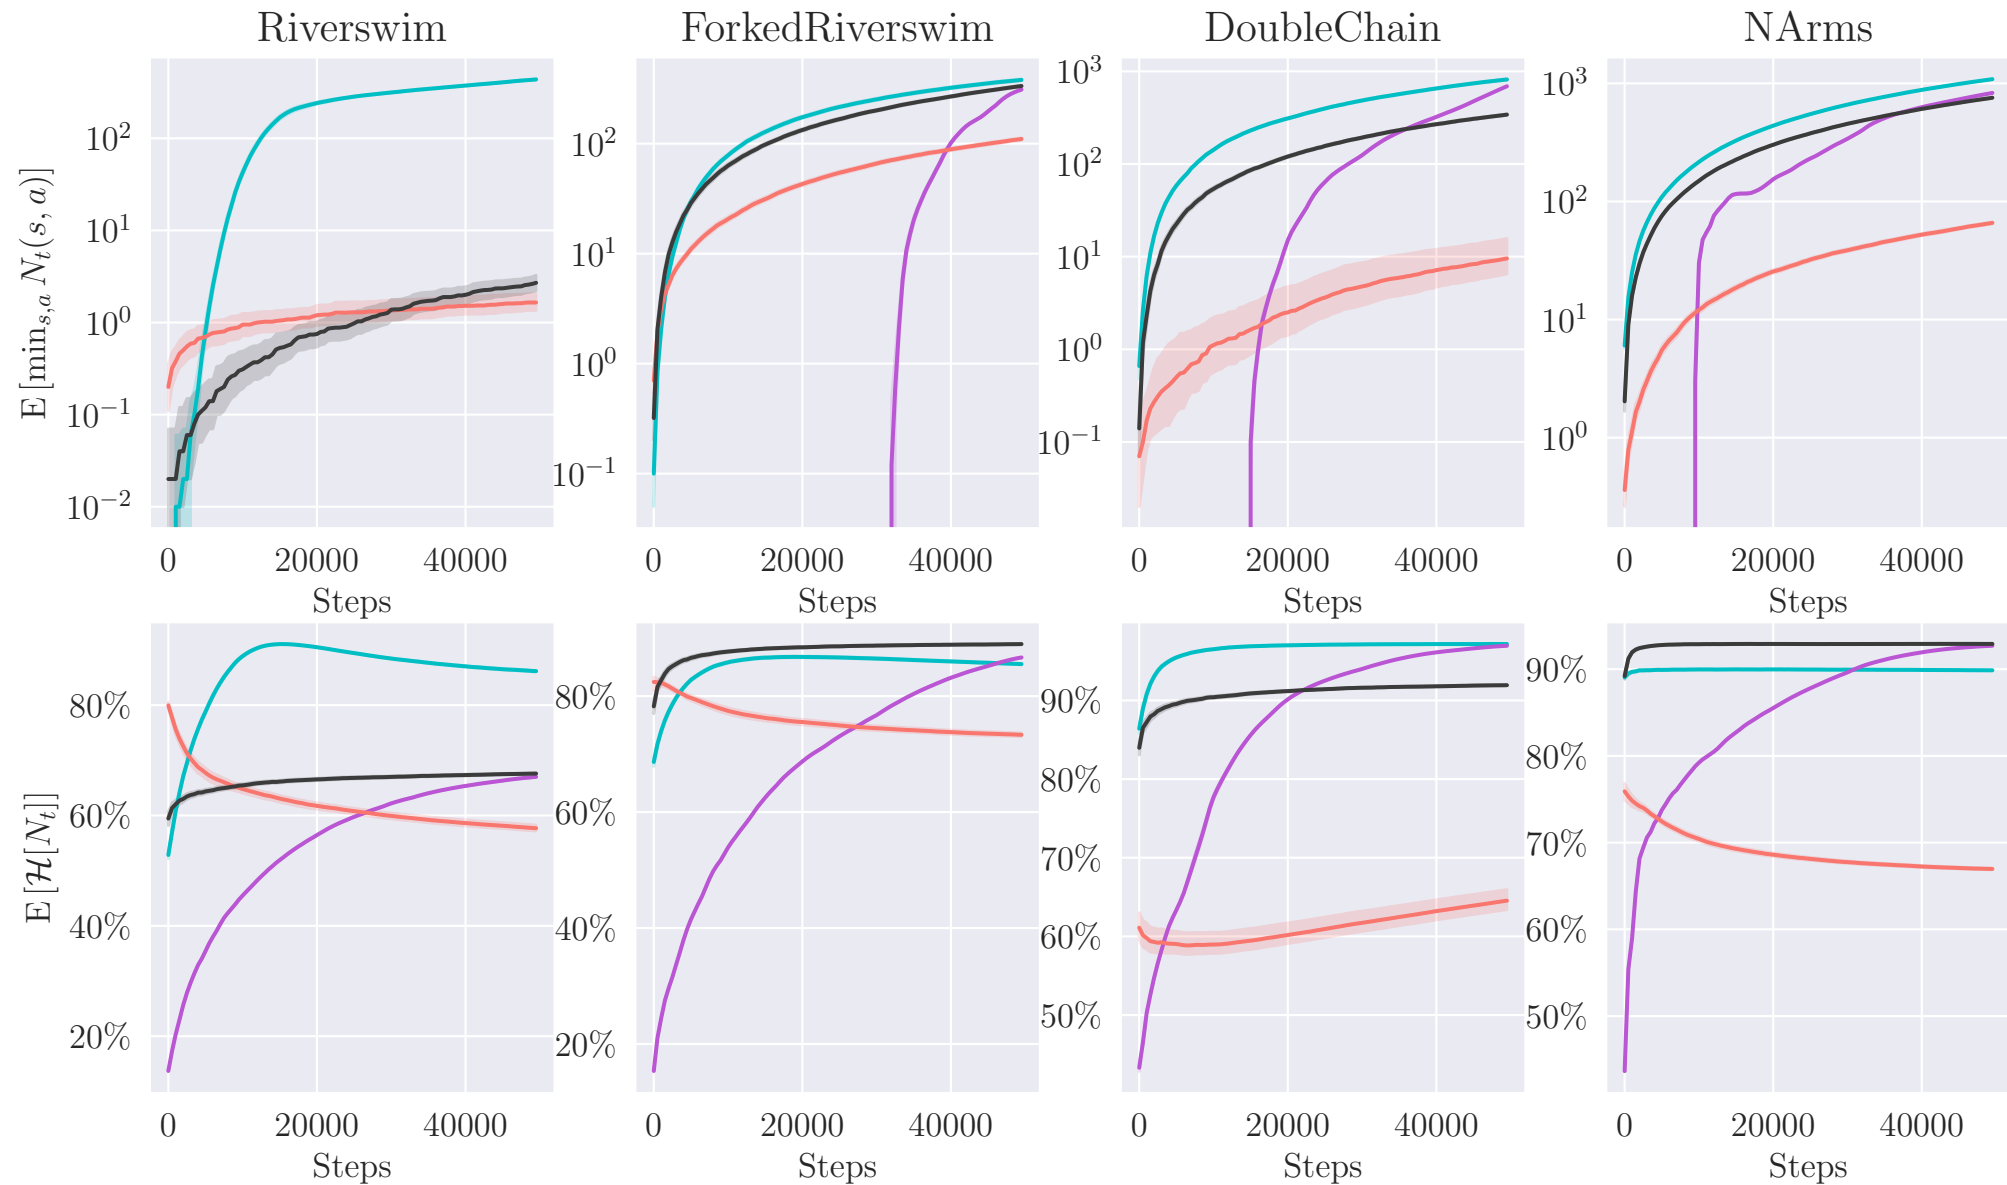

Supplement: supplementary_material [file attachment]

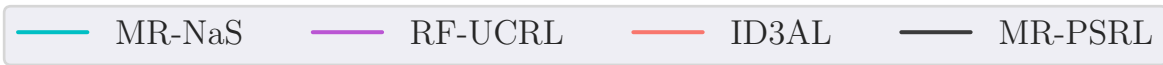

Riverswim

ForkedRiverswim

DoubleChain

NArms

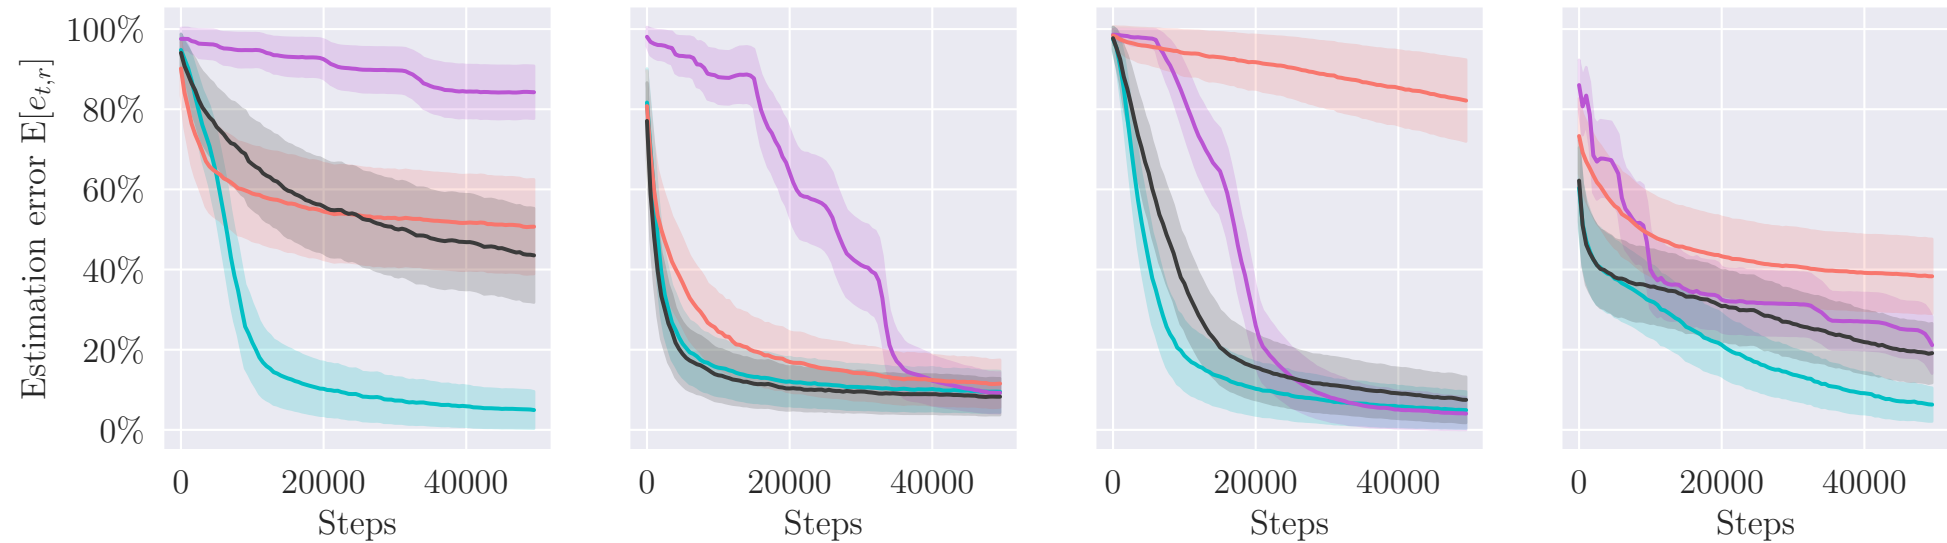

Supplement: supplementary_material [file attachment]
